# Supplementary material for: The association of potentially inappropriate medication use on health outcomes and hospital costs in community-dwelling older persons: a longitudinal 12-year study
Source: Springer Nature journal article supplement (doi:10.1007/s10198-018-0992-0), 2018-07-05
Supplement: MOESM2 [file 15911088]

**Electronic Supplementary Material 2**

**The Association of Potentially Inappropriate Medication Use on Health Outcomes and Hospital Costs in Community-Dwelling Older Persons: A Longitudinal 12-year Study**

*The European Journal of Health Economics*

Virva Hyttinen1, Johanna Jyrkkä2, Leena K. Saastamoinen3, Anna-Kaisa Vartiainen1, Hannu Valtonen1

1Department of Health and Social Management, University of Eastern Finland, Kuopio, Finland

2Assessment of Pharmacotherapies, Finnish Medicines Agency, Kuopio, Finland

3Kela Research, The Social Insurance Institution, Helsinki, Finland

Corresponding author: [virva.hyttinen@uef.fi](mailto:virva.hyttinen@uef.fi)

**Online Resource 2.** The ten most frequently used PIMs in the matched population.

| **PIM (ATC code)** | **The number of users (%)**  **n=10,333** |
| --- | --- |
| Tizanidine (M03BX02) | 2031 (19.7) |
| Metoclopramide (A03FA01) | 1487 (14.4) |
| Tolterodine (G04BD07) | 995 (9.6) |
| Opium alkaloids and derivatives comb. (R05DA20) | 915 (8.9) |
| Orphenadrine, comb. (M03BC51) | 912 (8.8) |
| Solifenacin (G04BD08) | 855 (8.3) |
| Oxubutynin (G04BD04) | 608 (5.9) |
| Diazepam (N05BA01) | 589 (5.7) |
| Moxonidine (C02AC05) | 521 (5.0) |
| Propranolol (C07AA05) | 491 (4.8) |
| PIM, potentially inappropriate medication; ATC, Anatomical Therapeutic Chemical | |
