# Supplementary material for: The association of potentially inappropriate medication use on health outcomes and hospital costs in community-dwelling older persons: a longitudinal 12-year study
Source: Springer Nature journal article supplement (doi:10.1007/s10198-018-0992-0), 2018-07-05
Supplement: MOESM3 [file 15911088]

**Electronic Supplementary Material 3**

**The Association of Potentially Inappropriate Medication Use on Health Outcomes and Hospital Costs in Community-Dwelling Older Persons: A Longitudinal 12-year Study**

*The European Journal of Health Economics*

Virva Hyttinen1, Johanna Jyrkkä2, Leena K. Saastamoinen3, Anna-Kaisa Vartiainen1, Hannu Valtonen1

1Department of Health and Social Management, University of Eastern Finland, Kuopio, Finland

2Assessment of Pharmacotherapies, Finnish Medicines Agency, Kuopio, Finland

3Kela Research, The Social Insurance Institution, Helsinki, Finland

Corresponding author: [virva.hyttinen@uef.fi](mailto:virva.hyttinen@uef.fi)

**Online Resource 3.** Table 1: Associated risk of mortality within 1, 3 and 6 months after the initiation of PIM use in time-varying cox proportional hazards regression stratified by gender.

|  | **Male** |  | **Female** |  | **Male** |  | **Female** |  | **Male** |  | **Female** |  |
| --- | --- | --- | --- | --- | --- | --- | --- | --- | --- | --- | --- | --- |
|  | **1 month** |  | **1 month** |  | **3 months** |  | **3 months** |  | **6 months** |  | **6 months** |  |
|  | **PSM adjusted HR** | **95% CI** | **PSM adjusted HR** | **95% CI** | **PSM adjusted HR** | **95% CI** | **PSM adjusted HR** | **95% CI** | **PSM adjusted HR** | **95% CI** | **PSM adjusted HR** | **95% CI** |
| **The first PIM use perioda** |  |  |  |  |  |  |  |  |  |  |  |  |
| Non-users | 1.00 (reference) |  | 1.00 (reference) |  | 1.00 (reference) |  | 1.00 (reference) |  | 1.00 (reference) |  | 1.00 (reference) |  |
| PIM-users | 4.01*** | (3.11–5.17) | 3.12*** | (2.37–4.11) | 3.52*** | (3.04–4.07) | 2.92*** | (2.51–3.39) | 2.53*** | (2.28–2.81) | 1.97*** | (1.77–2.19) |
| Number of deaths | **1,974** |  | **2,373** |  | **2,111** |  | **2,507** |  | **2,343** |  | **2,723** |  |
| **PH-assumption test** | **0.0322** |  | **<0.001** |  | **0.0266** |  | **<0.001** |  | **<0.001** |  | **<0.001** |  |
| **PIM use** |  |  |  |  |  |  |  |  |  |  |  |  |
| Non-users | 1.00 (reference) |  | 1.00 (reference) |  | 1.00 (reference) |  | 1.00 (reference) |  | 1.00 (reference) |  | 1.00 (reference) |  |
| PIM-users | 1.49*** | (1.28–1.75) | 1.29** | (1.11–1.50) | 1.89*** | (1.72–2.09) | 1.49*** | (1.35–1.64) | 2.07*** | (1.90–2.25) | 1.62*** | (1.49–1.76) |
| **Ageb** |  |  |  |  |  |  |  |  |  |  |  |  |
| 65–74 years | 1.00 (reference) |  | 1.00 (reference) |  | 1.00 (reference) |  | 1.00 (reference) |  | 1.00 (reference) |  | 1.00 (reference) |  |
| 75–84 years | 2.07*** | (1.94–2.22) | 2.88*** | (2.69–3.08) | 2.06*** | (1.93–2.21) | 2.88*** | (2.69–3.07) | 2.06*** | (1.92–2.20) | 2.88*** | (2.69–3.07) |
| ≥85 years | 5.23*** | (4.53–6.05) | 8.05*** | (7.25–8.95) | 5.16*** | (4.46–5.96) | 8.02*** | (7.22–8.90) | 5.10*** | (4.42–5.90) | 7.98*** | (7.19–8.87) |
| **Socioeconomic status (income)c** |  |  |  |  |  |  |  |  |  |  |  |  |
| <9,999 € | 1.00 (reference) |  | 1.00 (reference) |  | 1.00 (reference) |  | 1.00 (reference) |  | 1.00 (reference) |  | 1.00 (reference) |  |
| 10,000–19,999 € | 0.94 | (0.87–1.03) | 0.92* | (0.86–0.98) | 0.95 | (0.88–1.04) | 0.92* | (0.86–0.98) | 0.96 | (0.88–1.04) | 0.92* | (0.86–0.98) |
| 20,000–29,999 € | 0.72*** | (0.63–0.83) | 0.90 | (0.79–1.03) | 0.72*** | (0.63–0.83) | 0.90 | (0.79–1.03) | 0.72*** | (0.63–0.83) | 0.90 | (0.79–1.03) |
| >30,000 € | 0.67*** | (0.56–0.79) | 0.77* | (0.62–0.95) | 0.67*** | (0.56–0.80) | 0.77* | (0.63–0.95) | 0.67*** | (0.56–0.80) | 0.77* | (0.63–0.95) |
| **Living alonec** | 1.29*** | (1.19–1.40) | 1.00 | (0.94–1.07) | 1.28*** | (1.18–1.39) | 1.00 | (0.94–1.07) | 1.28*** | (1.18–1.39) | 1.00 | (0.94–1.07) |
| **Medication used** |  |  |  |  |  |  |  |  |  |  |  |  |
| Antidiabetics | 1.42*** | (1.28–1.58) | 1.66*** | (1.50–1.82) | 1.40*** | (1.26–1.55) | 1.65*** | (1.50–1.81) | 1.39*** | (1.25–1.55) | 1.64*** | (1.49–1.81) |
| Psychotropics | 1.23*** | (1.13–1.33) | 1.17*** | (1.09–1.25) | 1.21*** | (1.12–1.32) | 1.16*** | (1.09–1.24) | 1.21*** | (1.11–1.31) | 1.16*** | (1.08–1.24) |
| Cardiovascular medications | 1.22*** | (1.13–1.32) | 1.37*** | (1.28–1.48) | 1.22*** | (1.13–1.32) | 1.37*** | (1.27–1.48) | 1.22*** | (1.13–1.32) | 1.37*** | (1.27–1.47) |
| Opioids | 1.29*** | (1.13–1.47) | 1.40*** | (1.24–1.58) | 1.29*** | (1.13–1.47) | 1.40*** | (1.24–1.58) | 1.29*** | (1.13–1.47) | 1.39*** | (1.24–1.57) |
| NSAIDs | 0.87*** | (0.81–0.94) | 0.87*** | (0.82–0.93) | 0.87*** | (0.81–0.93) | 0.87*** | (0.82–0.93) | 0.87*** | (0.81–0.93) | 0.87*** | (0.81–0.92) |
| **Excessive polypharmacyd** | 1.60*** | (1.45–1.76) | 1.42*** | (1.31–1.54) | 1.58*** | (1.44–1.75) | 1.42*** | (1.31–1.53) | 1.58*** | (1.43–1.74) | 1.41*** | (1.30–1.53) |
| Number of deaths | **3,639** |  | **4,394** |  | **3,639** |  | **4,394** |  | **3,639** |  | **4,394** |  |
| Number of subjects | **7,786** |  | **12,880** |  | **7,786** |  | **12,880** |  | **7,786** |  | **12,880** |  |
| **PH-assumption test** | **<0.001** |  | **<0.001** |  | **<0.001** |  | **<0.001** |  | **<0.001** |  | **<0.001** |  |
| *p<0.05 **p<0.01 ***p<0.001  PSM, propensity score matching; PIM, potentially inappropriate medication; HR, hazard ratio; CI, confidence interval; NSAID, nonsteroidal anti-inflammatory drug; PH, proportional hazard  aAdjusted for age, gender, socioeconomic status (income), living situation, morbidity (the use of antidiabetics, psychotropics, cardiovascular medications, opioids and nonsteroidal anti-inflammatory drugs) and excessive polypharmacy.  bAt the start of the follow-up (1 Jan 2002)  cYear 2000  dAt the washout period (years 2000–2001) | | | | | | | | | | | | |

**Online Resource 3.** Table 2: Associated risk of mortality within 1, 3 and 6 months after the initiation of PIM use in time-varying cox proportional hazards regression stratified by age.

|  | **<75 years** |  | **≥75 years** |  | **<75 years** |  | **≥75 years** |  | **<75 years** |  | **≥75 years** |  |
| --- | --- | --- | --- | --- | --- | --- | --- | --- | --- | --- | --- | --- |
|  | **1 month** |  | **1 month** |  | **3 months** |  | **3 months** |  | **6 months** |  | **6 months** |  |
|  | **PSM adjusted HR** | **95% CI** | **PSM adjusted HR** | **95% CI** | **PSM adjusted HR** | **95% CI** | **PSM adjusted HR** | **95% CI** | **PSM adjusted HR** | **95% CI** | **PSM adjusted HR** | **95% CI** |
| **The first PIM use perioda** |  |  |  |  |  |  |  |  |  |  |  |  |
| Non-users | 1.00 (reference) |  | 1.00 (reference) |  | 1.00 (reference) |  | 1.00 (reference) |  | 1.00 (reference) |  | 1.00 (reference) |  |
| PIM-users | 4.62*** | (3.52–6.06) | 3.06*** | (2.37–3.96) | 4.32*** | (3.71–5.03) | 2.69*** | (2.33–3.11) | 2.88*** | (2.58–3.22) | 1.90*** | (1.72–2.11) |
| Number of deaths | **1,809** |  | **2,538** |  | **1,941** |  | **2,677** |  | **2,145** |  | **2,921** |  |
| **PH-assumption test** | **<0.001** |  | **<0.001** |  | **<0.001** |  | **<0.001** |  | **<0.001** |  | **<0.001** |  |
| **PIM use (all exposure periods)** |  |  |  |  |  |  |  |  |  |  |  |  |
| Non-users | 1.00 (reference) |  | 1.00 (reference) |  | 1.00 (reference) |  | 1.00 (reference) |  | 1.00 (reference) |  | 1.00 (reference) |  |
| PIM-users | 1.71*** | (1.46–1.99) | 1.18* | (1.01–1.38) | 2.20*** | (2.00–2.42) | 1.35*** | (1.22–1.48) | 2.37*** | (2.18–2.58) | 1.49*** | (1.37–1.62) |
| **Gender** |  |  |  |  |  |  |  |  |  |  |  |  |
| Male | 1.00 (reference) |  | 1.00 (reference) |  | 1.00 (reference) |  | 1.00 (reference) |  | 1.00 (reference) |  | 1.00 (reference) |  |
| Female | 0.46*** | (0.43–0.49) | 0.65*** | (0.61–0.69) | 0.46*** | (0.43–0.49) | 0.65*** | (0.61–0.70) | 0.46*** | (0.43–0.49) | 0.65*** | (0.61–0.70) |
| **Socioeconomic status (income)c** |  |  |  |  |  |  |  |  |  |  |  |  |
| <9,999 € | 1.00 (reference) |  | 1.00 (reference) |  | 1.00 (reference) |  | 1.00 (reference) |  | 1.00 (reference) |  | 1.00 (reference) |  |
| 10,000–19,999 € | 0.83*** | (0.77–0.91) | 0.99 | (0.92–1.06) | 0.84*** | (0.77–0.91) | 0.99 | (0.92–1.06) | 0.84*** | (0.77–0.91) | 0.99 | (0.92–1.06) |
| 20,000–29,999 € | 0.68*** | (0.59–0.78) | 0.93 | (0.82–1.05) | 0.68*** | (0.59–0.78) | 0.93 | (0.82–1.05) | 0.68*** | (0.59–0.78) | 0.93 | (0.82–1.05) |
| >30,000 € | 0.56*** | (0.46–0.68) | 0.84* | (0.70–1.00) | 0.56*** | (0.46–0.69) | 0.84 | (0.70–1.00) | 0.56*** | (0.46–0.68) | 0.84 | (0.70–1.00) |
| **Living aloneb** | 1.17*** | (1.08–1.27) | 1.13*** | (1.06–1.21) | 1.18*** | (1.08–1.28) | 1.13*** | (1.06–1.21) | 1.18*** | (1.09–1.28) | 1.13*** | (1.06–1.21) |
| **Medication usec** |  |  |  |  |  |  |  |  |  |  |  |  |
| Antidiabetics | 1.64*** | (1.48–1.82) | 1.40*** | (1.27–1.54) | 1.61*** | (1.45–1.79) | 1.39*** | (1.26–1.53) | 1.60*** | (1.44–1.78) | 1.39*** | (1.26–1.53) |
| Psychotropics | 1.25*** | (1.15–1.37) | 1.20*** | (1.12–1.28) | 1.23*** | (1.13–1.34) | 1.20*** | (1.12–1.28) | 1.22*** | (1.12–1.33) | 1.19*** | (1.12–1.27) |
| Cardiovascular medications | 1.30*** | (1.20–1.41) | 1.30*** | (1.21–1.40) | 1.29*** | (1.20–1.40) | 1.30*** | (1.21–1.40) | 1.29*** | (1.20–1.40) | 1.30*** | (1.21–1.40) |
| Opioids | 1.39*** | (1.21–1.60) | 1.31*** | (1.17–1.47) | 1.38*** | (1.20–1.59) | 1.31*** | (1.17–1.47) | 1.38*** | (1.20–1.59) | 1.31*** | (1.17–1.47) |
| NSAIDs | 0.85*** | (0.79–0.92) | 0.90*** | (0.84–0.95) | 0.85*** | (0.79–0.91) | 0.89*** | (0.84–0.95) | 0.84*** | (0.78–0.91) | 0.89*** | (0.84–0.95) |
| **Excessive polypharmacyc** | 1.62*** | (1.46–1.79) | 1.43*** | (1.32–1.54) | 1.59*** | (1.43–1.76) | 1.42*** | (1.32–1.54) | 1.57*** | (1.42–1.74) | 1.42*** | (1.32–1.54) |
| Number of deaths | **3,427** |  | **4,606** |  | **3,427** |  | **4,606** |  | **3,427** |  | **4,606** |  |
| Number of subjects | **12,360** |  | **8,306** |  | **12,360** |  | **8,306** |  | **12,360** |  | **8,306** |  |
| **PH-assumption test** | **<0.001** |  | **<0.001** |  | **<0.001** |  | **<0.001** |  | **<0.001** |  | **<0.001** |  |
| *p<0.05 **p<0.01 ***p<0.001  PSM, propensity score matching; PIM, potentially inappropriate medication; HR, hazard ratio; CI, confidence interval; NSAID, nonsteroidal anti-inflammatory drug; PH, proportional hazard  aAdjusted for age, gender, socioeconomic status (income), living situation, morbidity (the use of antidiabetics, psychotropics, cardiovascular medications, opioids and nonsteroidal anti-inflammatory drugs) and excessive polypharmacy.  bYear 2000  cAt the washout period (years 2000–2001) | | | | | | | | | | | | |
